# Supplementary material
Source: PubMed Central journal article supplement (PMC3480320)

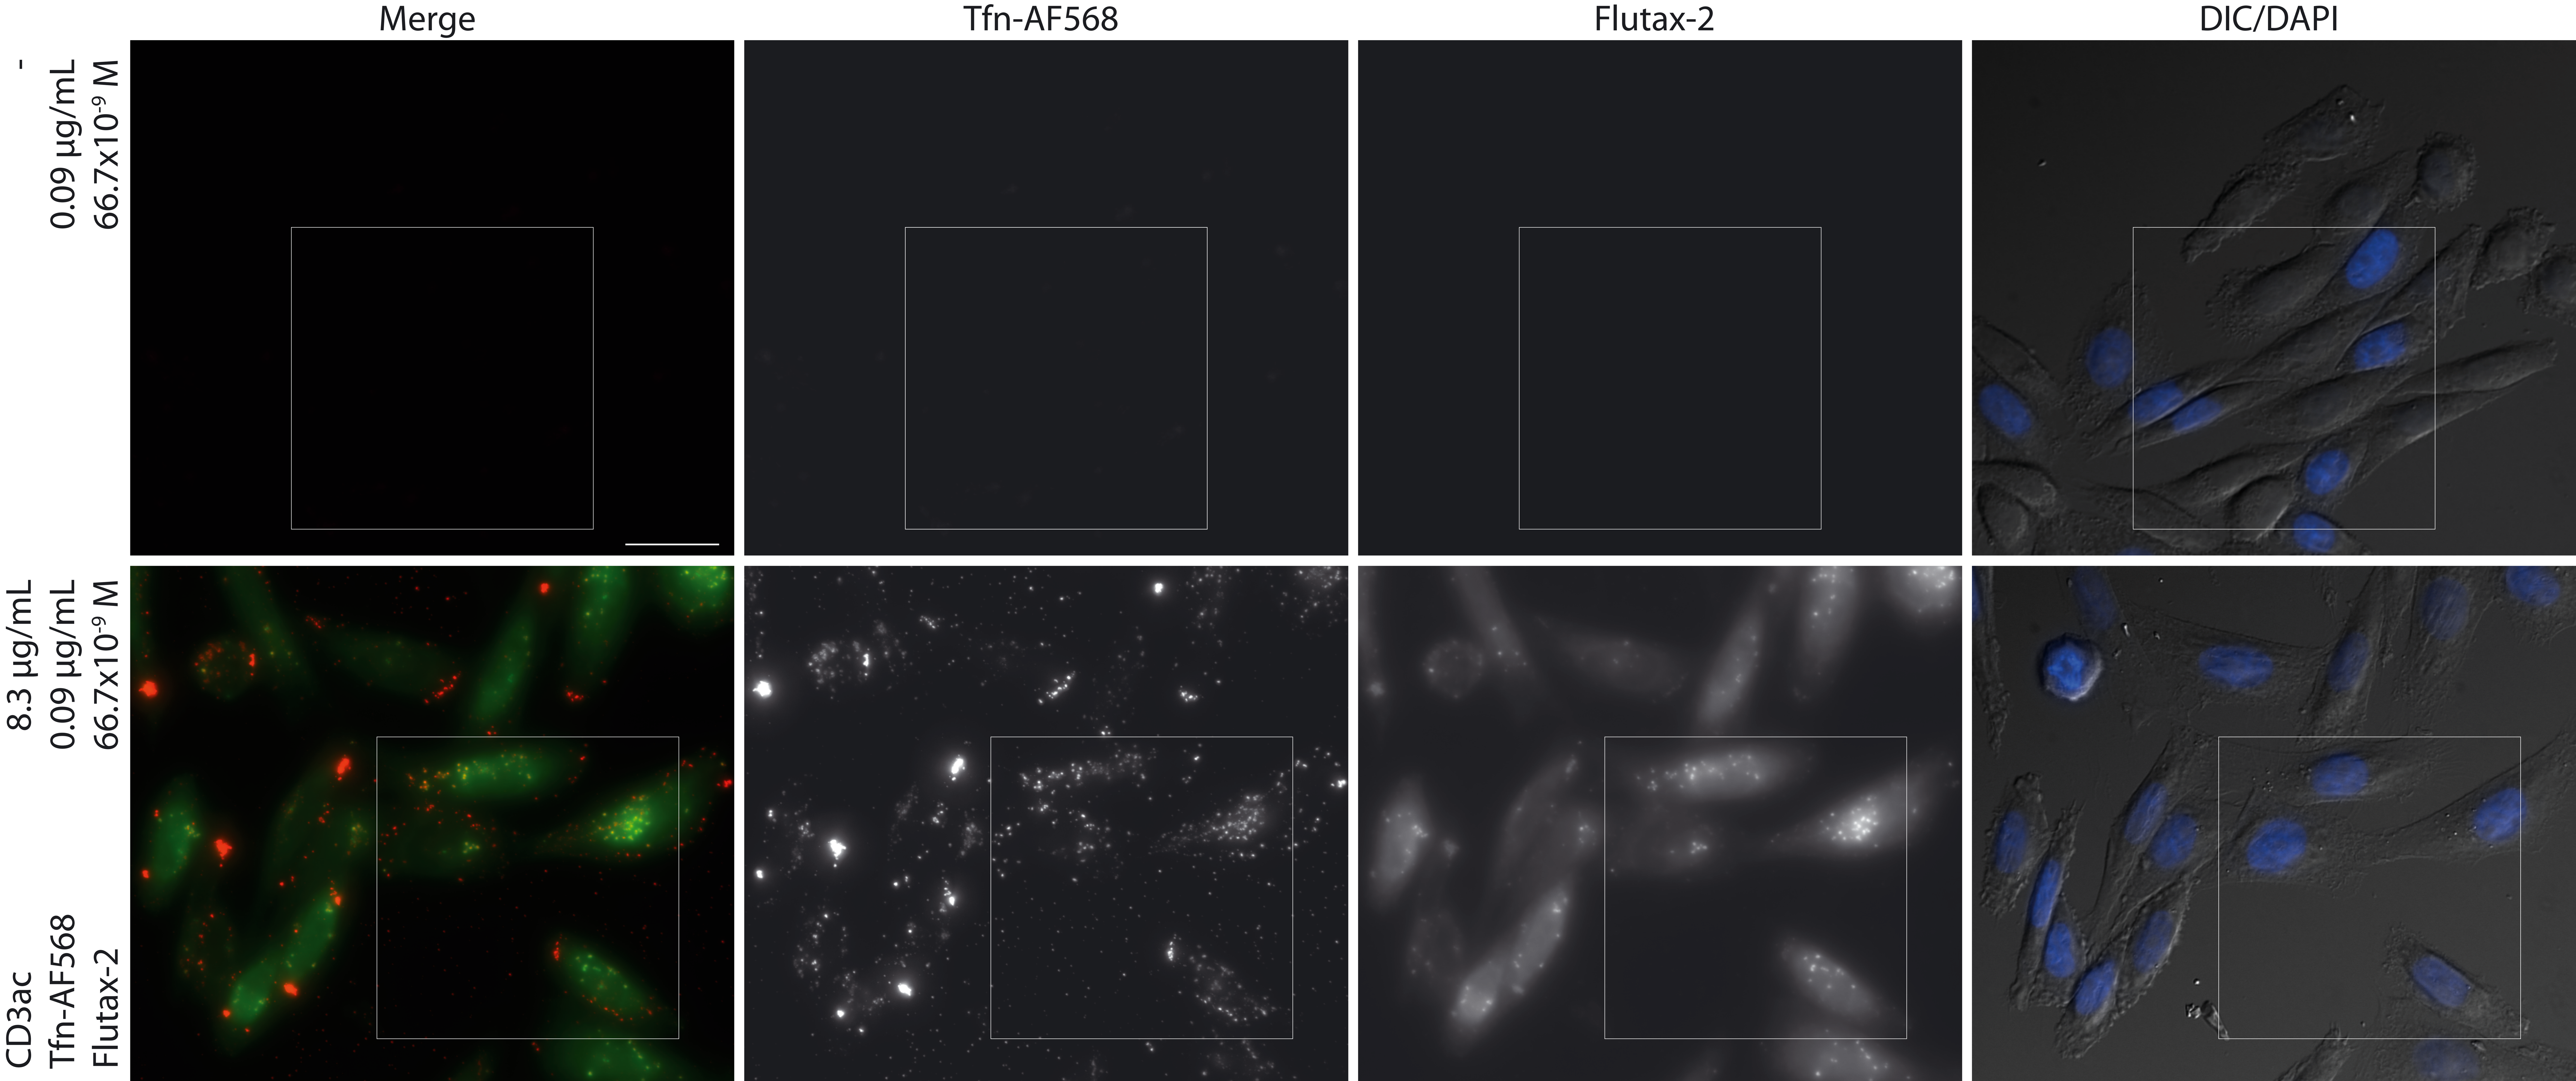

Supplement: NIHMS349094-supplement-07.pdf [file NIHMS349094-supplement-07.pdf]
